# Supplementary material
Source: Springer Nature journal article supplement (https://www.springermedizin.de/resource/supplementary/12943_2012_1036_MOESM2_ESM.pdf/9552144)
Supplement: MOESM2 [file 9552144]

Supplement Fig 2

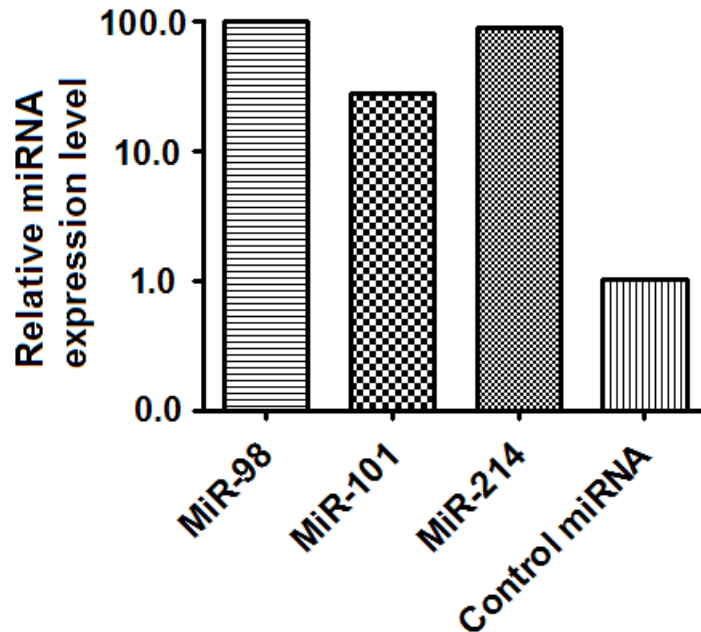

Fig. S2 The expression levels of miRNAs were significantly increased in Eca109 cells transfected with miRNA mimics.

Total RNA was extracted from  $1 \times 10^5$  cells using the miRNeasy Mini Kit (QIAGEN). Reverse transcription reactions and real-time PCR reactions were performed using miScript PCR Starter Kit (QIAGEN) and Hs\_miRNA miScript Primer Assay system (QIAGEN) according to the manufacturer's protocol. PCR was performed on a LightCycler and analysis was carried out using RealQuant software. Threshold cycle (Ct) values were assigned according to the cycle number at which a fixed fluorescent intensity was achieved. A  $\Delta Ct$  value was calculated by  $Ct(\text{miRNA}) - Ct(\text{U6})$ . Fold induction of mature miRNA expression level in the miRNA mimics (or control miRNA) transfected cells relative to the untreated cells was then calculated as  $2^{-\Delta\Delta Ct}$ , where  $\Delta\Delta Ct$  is the difference between  $\Delta Ct$  (microRNA treated cells) and  $\Delta Ct$  (untreated cells). Our data showed that the level of mature miR-98, miR-101, and miR-214 in Eca109 cells transfected with miRNA mimics was about 97-fold, 35-fold, and 83-fold higher than that in cells transfected with control microRNA at 48 hr posttransfection, respectively. \*\*,  $P < 0.01$  by t test.
